# Supplementary material
Source: PubMed Central journal article supplement (PMC7499238)
Supplement: jamaotolaryngolheadnecksurg-e203025-s002.pdf [file jamaotolaryngolheadnecksurg-e203025-s002.pdf]

## Data Sharing Statement

Peterson. Efficacy of Timolol in a Novel Intranasal Thermosensitive Gel for Hereditary Hemorrhagic Telangiectasia-Associated Epistaxis. *JAMA Otolaryngol Head Neck Surg*. Published September 17, 2020. 10.1001/jamaoto.2020.3025

### Data

**Data available:** No
